# Supplementary material for: Template-free synthesis of nanoporous gadolinium phosphonate as a magnetic resonance imaging (MRI) agent
Source: Royal Society of Chemistry journal article supplement (doi:10.1039/c5ra02004b), 2015-01-01
Supplement: c5ra02004b1.pdf [file c5ra02004b1.pdf]

1

### Supporting information

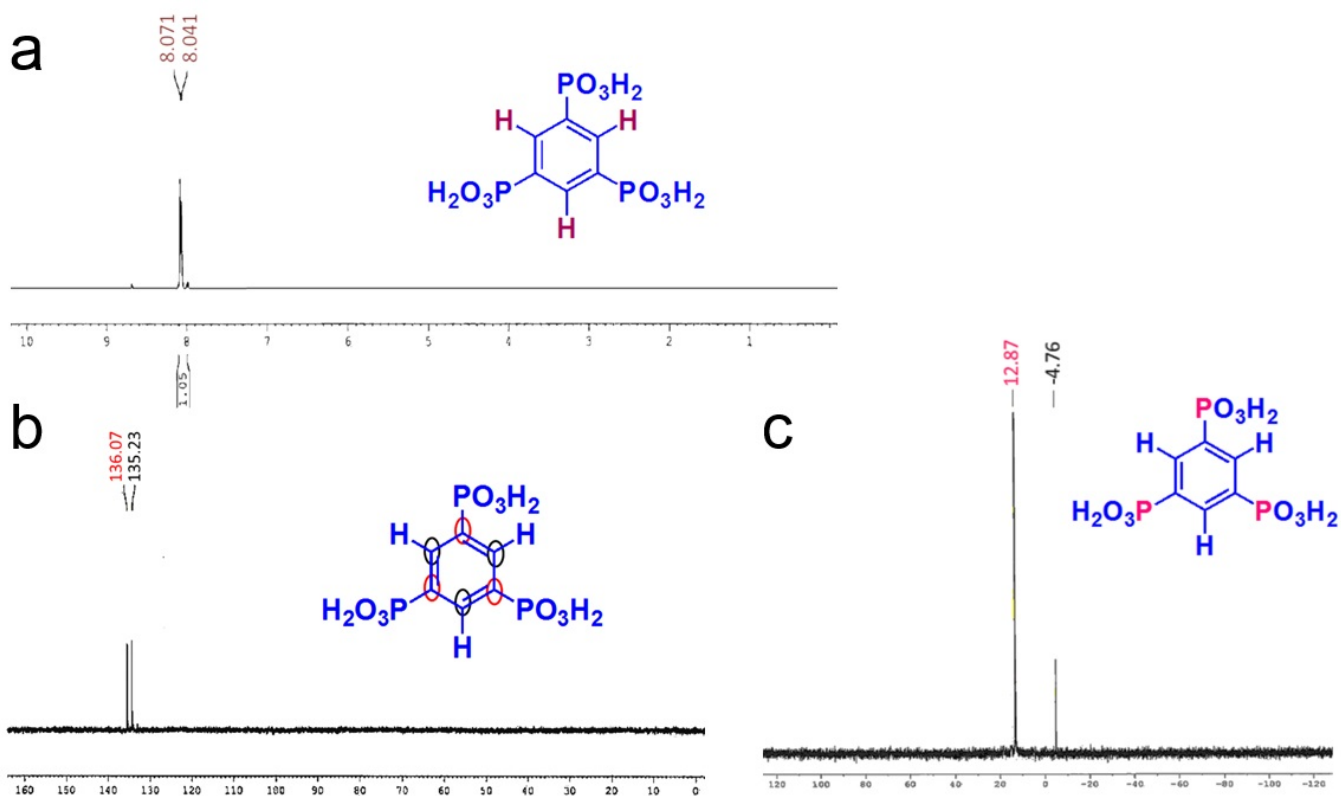

2

3 **Fig. S1** (a) <sup>1</sup>H NMR spectrum, (b) <sup>13</sup>C NMR spectrum, and (c) <sup>31</sup>P NMR spectrum of BTPA (PPh<sub>3</sub> is used as  
4 internal standard, and the peak at -4.76 ppm is due to the P of PPh<sub>3</sub>).

5

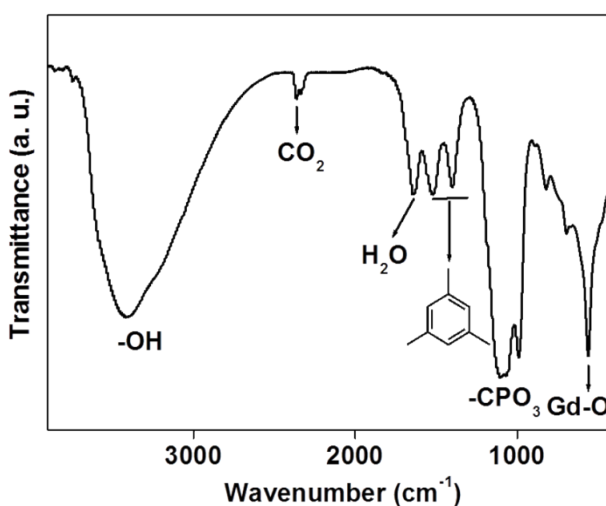

6

7

8

**Fig. S2** FT IR spectrum of GdP-H.

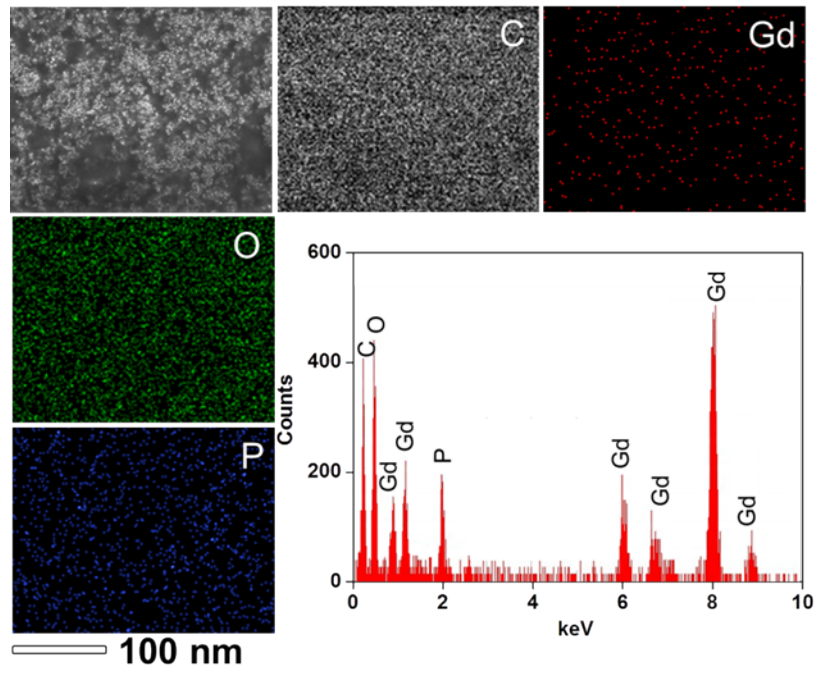

**Fig. S3** Elemental mapping of GdP-H.

1  
2  
3  
4  
5

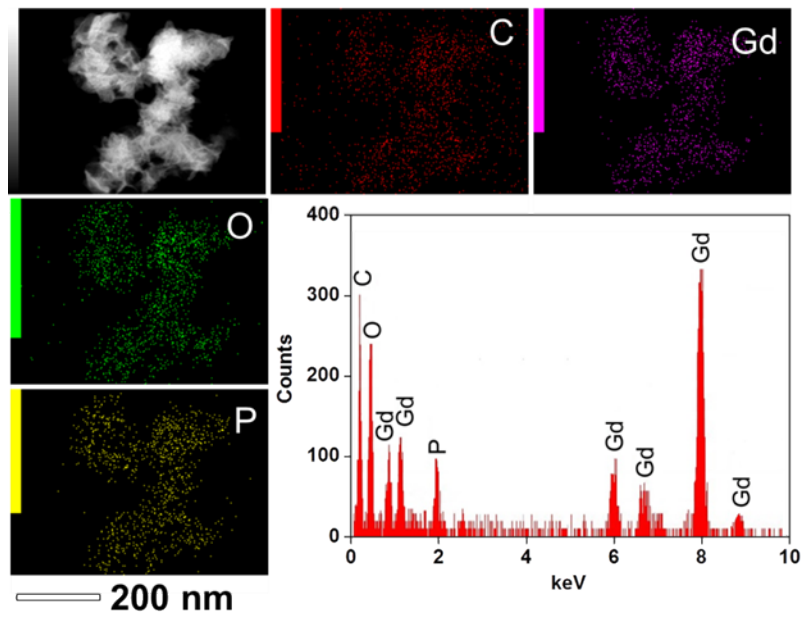

**Fig. S4** Elemental mapping of GdP-AC.

6  
7  
8

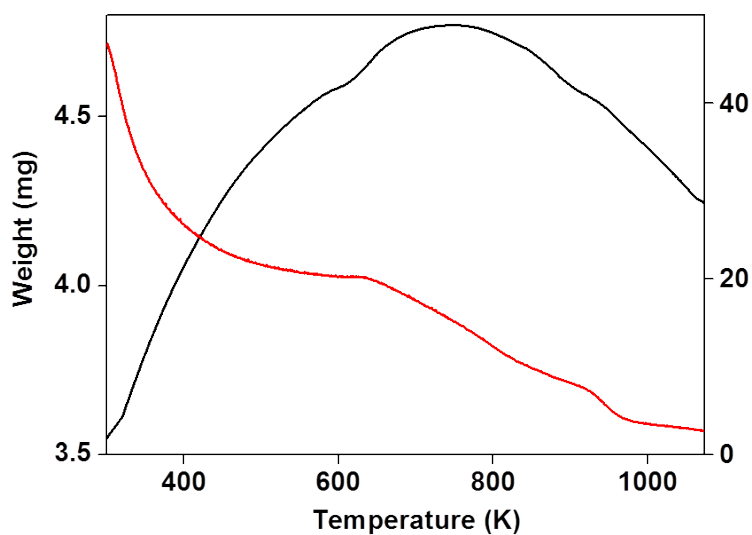

Fig. S5 TG-DTA profile of GdP-H.

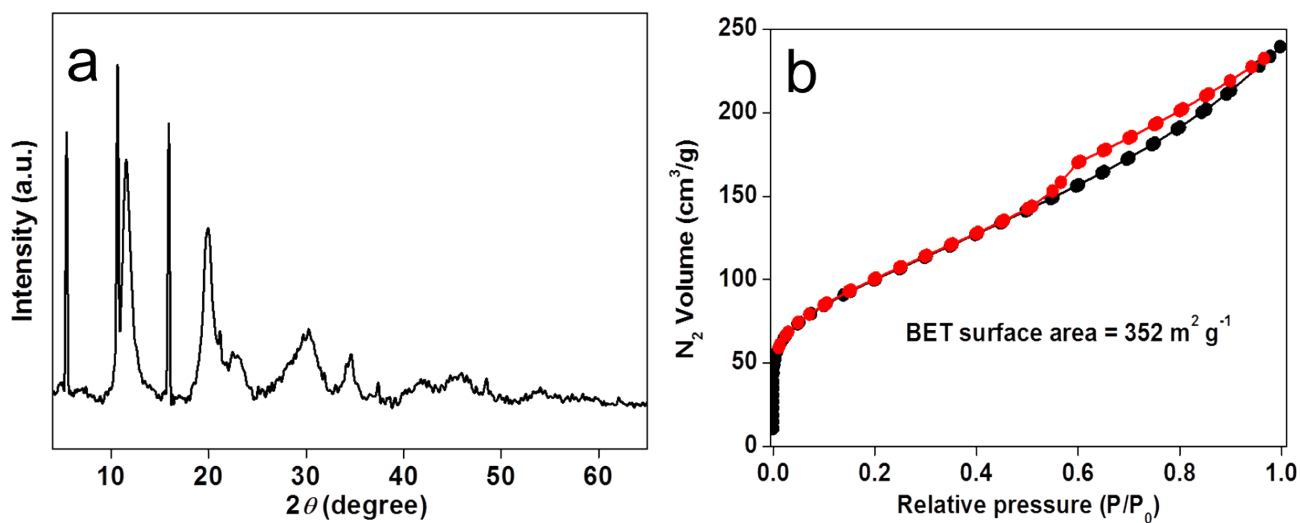

Fig. S6 (a) Wide angle X-ray diffraction pattern and (b) N<sub>2</sub> adsorption (filled black circles)-desorption (filled red circles) isotherm of GdP-H material after water treatment for 24 h.
